# Supplementary material
Source: publisher figshare collection journal article supplement (https://acs.figshare.com/ndownloader/files/4795387)
Supplement: Supplementary file 1 [file 4795387]

The present document provides the supporting information for the article titled

**Structural and functional significance of the N- and C-terminal appendages  
in *Arabidopsis* truncated hemoglobin**

Nitika Mukhi<sup>1</sup>, Sonali Dhindwal<sup>2</sup>, Sheetal Uppal<sup>3</sup>, Abhijeet Kapoor<sup>3</sup>, Richa Arya<sup>3</sup>, Pravindra  
Kumar<sup>2</sup>, Jagreet Kaur<sup>1,\*</sup> and Suman Kundu<sup>3,\*</sup>

<sup>1</sup>Department of Genetics, University of Delhi South Campus, New Delhi 110021, India

<sup>2</sup>Department of Biotechnology, Indian Institute of Technology, Roorkee, Uttarakhand 247667, India

<sup>3</sup>Department of Biochemistry, University of Delhi South Campus, New Delhi 110021, India

**Corresponding authors:** E-mail: [suman.kundu@south.du.ac.in](mailto:suman.kundu@south.du.ac.in), [jagreet@south.du.ac.in](mailto:jagreet@south.du.ac.in); Tel: +91-11-24117460, Fax: +91-11-24115270.

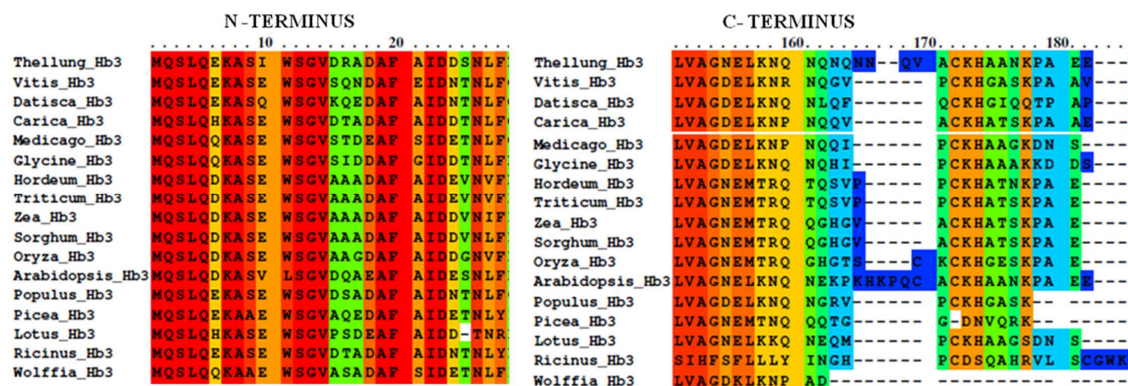

**Supplementary Fig. 1 Multiple sequence alignment of the N- and C-terminal extensions**  
among plant truncated hemoglobins display highly conserved N –terminus.

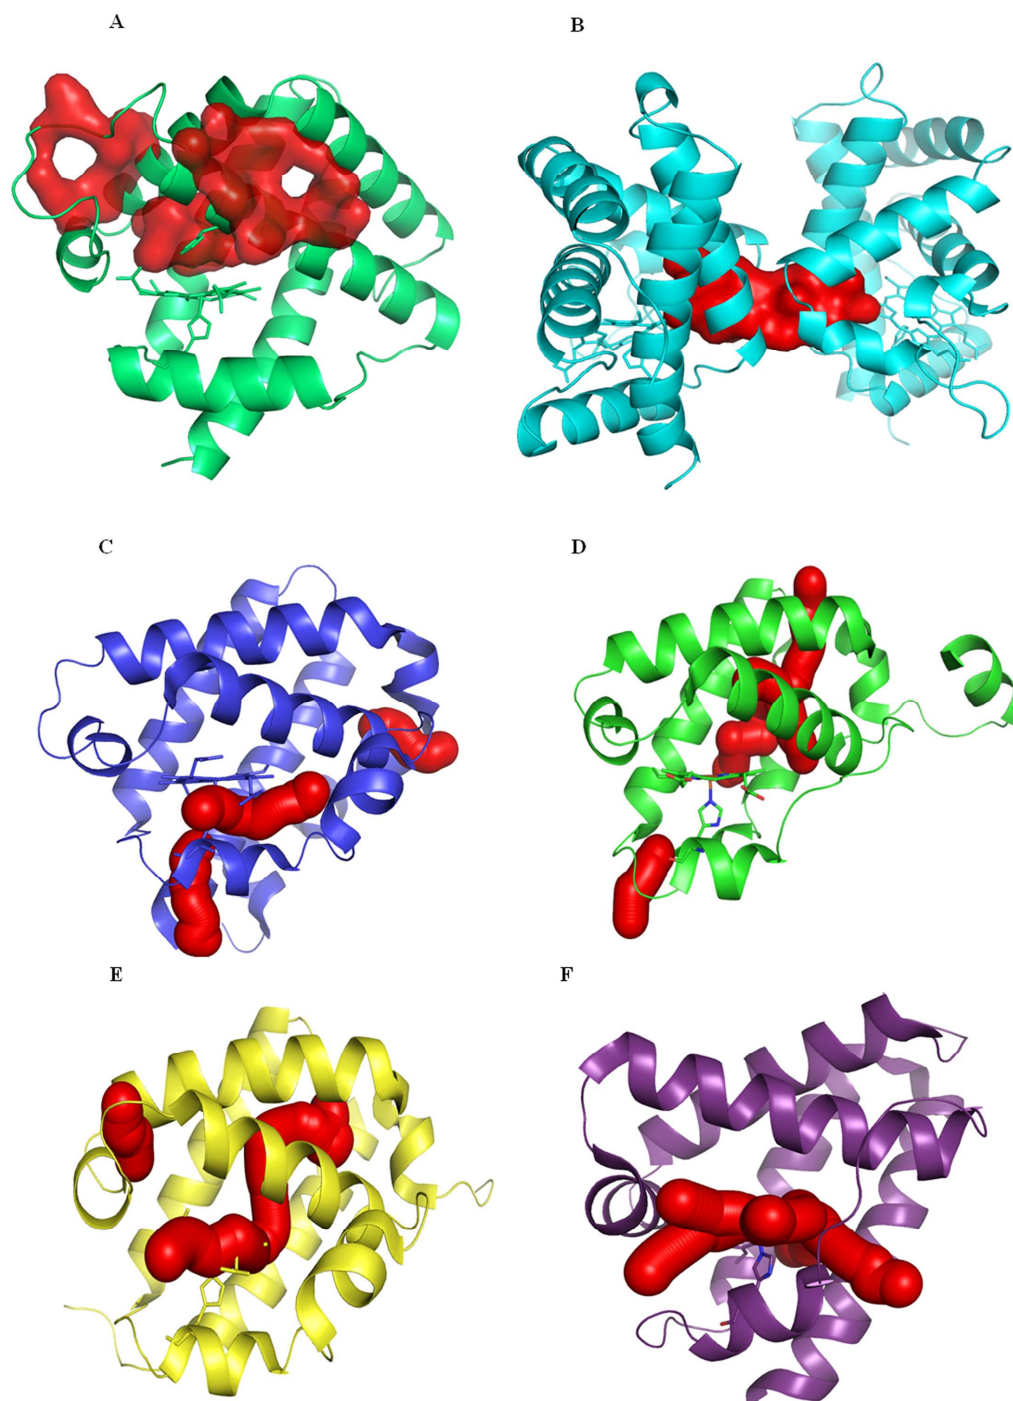

**Supplementary Fig. 2 Comparative tunnel topologies of crystal structures of 3-on-3 and 2-on-2 hemoglobins** (A) Symbiotic plant hemoglobin (Lba); Pdb id : 1MBN (B) *Arabidopsis* nonsymbiotic hemoglobin 1; Pdb id : 3ZHW (C) *Arabidopsis* truncated haemoglobin (trHb) 3; Pdb id : 4C44 (D) *Mycobacterium tuberculosis* trHbN-Group I trHb; Pdb id : 1IDR (E) *Geobacillus stearothermophilus* trHb- Group II trHb; Pdb id : 2BKM (F) *Campylobacter jejuni* trHb - Group III trHb; Pdb id : 2IG3. The tunnels are indicated in red.

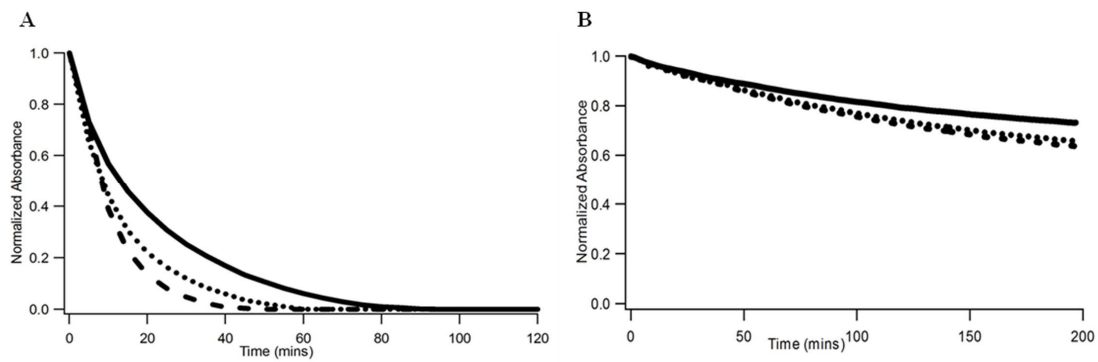

**Supplementary Fig. 3 Effect of the N- and C-terminal deletions on autooxidation and heme dissociation rates of AHb3.**

(A) Time course displaying normalized change of ratio of  $A_{581\text{nm}}/A_{630\text{nm}}$  for AHb3 (solid line), AHb3- $\Delta 25\text{C}$  (dotted line) and AHb3- $\Delta 25\text{N}$  (dash) indicating rates of autooxidation. (B) Time course displaying heme dissociation rates at pH 7.0 for AHb3 and its mutants. Normalized changes of the ratio,  $A_{409\text{ nm}}/A_{630\text{ nm}}$ , for the globins were plotted, indicating similar rates of heme dissociation.

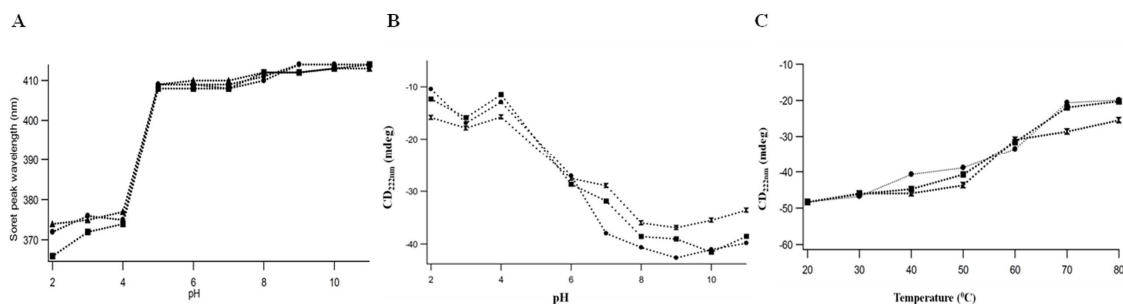

**Supplementary Fig. 4 Stability profiles of AHb3 and its mutants against denaturants.**

(A) Comparative pH titration profile of AHb3 (circle), AHb3-Δ25C (square) and AHb3-Δ25N (triangle) probed by absorbance measurements display similar stability. Effect of (B) pH and (C) temperature on the integrity of secondary structure of AHb3 (circle), AHb3-Δ25C (square) and AHb3-Δ25N (triangle) were investigated using far-UV CD spectroscopy. CD<sub>222nm</sub> was plotted as a function of the corresponding denaturing conditions. All the globins exhibited similar stability
